# Supplementary material for: Better health-related quality of life is associated with prolonged survival and reduced hospitalization risk among dialysis-dependent chronic kidney disease patients: a historical cohort study
Source: PubMed Central journal article supplement — BMC Nephrol. 2024 Oct 31;25:388. doi: 10.1186/s12882-024-03835-0 (PMC11526659; doi:10.1186/s12882-024-03835-0), 2024-10-31
Supplement: 12882_2024_3835_MOESM2_ESM.pdf [file 12882_2024_3835_MOESM2_ESM.pdf]

**Supplementary Table 1. Hazard ratio of baseline characteristics in Cox Regression Outcome Risk Score (ORS) model.** All baseline characteristics of the study sample are reported in table with the estimated hazard ratio values and its significance level (p-value) in the ORS model.

| Variable                         | Reference Category | Coefficient Estimate | Std error coefficient | p-value | Hazard Ratio (HR) |
|----------------------------------|--------------------|----------------------|-----------------------|---------|-------------------|
| Age                              |                    | 0.04034              | 0.00785               | <.0001  | 1.041             |
| Gender (Male)                    | Female             | -0.05675             | 0.17504               | 0.7458  | 0.945             |
| Etiology: Glomerulonephritis     | Metabolic Syndrome | 0.50829              | 0.23133               | 0.028   | 1.662             |
| Etiology: Polycystic Syndrome    | Metabolic Syndrome | 0.41334              | 0.40548               | 0.308   | 1.512             |
| Etiology: Other                  | Metabolic Syndrome | 0.26505              | 0.19385               | 0.1715  | 1.303             |
| Vascular Access: Catheter        | Fistula            | 0.60411              | 0.15869               | 0.0001  | 1.83              |
| Dialysis Modality: HD            | HDF                | 0.34628              | 0.16237               | 0.0329  | 1.414             |
| Smoking Status: missing          | no-smoker          | 0.43177              | 0.21073               | 0.0405  | 1.54              |
| Smoking Status: Smoker/Ex-smoker | no-smoker          | 0.62262              | 0.24372               | 0.0106  | 1.864             |
| Haemoglobin (g/dl): 10-12        | <10                | -0.12386             | 0.2826                | 0.6612  | 0.884             |
| Haemoglobin (g/dl) >12           | <10                | 0.12965              | 0.30874               | 0.6745  | 1.138             |
| Calcium (mg/dl): 8.4-10          | <8.4               | 0.64489              | 0.22817               | 0.0047  | 1.906             |
| Calcium (mg/dl): >10             | <8.4               | 0.5718               | 0.44115               | 0.1949  | 1.771             |
| Phosphate (mg/dl): 2.5-5.5       | <2.5               | -0.39174             | 0.2985                | 0.1894  | 0.676             |
| Phosphate (mg/dl): >5.5          | <2.5               | -0.57397             | 0.39814               | 0.1494  | 0.563             |
| Albumin (g/dl): >3.5             | <3.5               | -0.82317             | 0.19194               | <.0001  | 0.439             |
| Kt/V: 1.2-1.4                    | <1.2               | -0.74159             | 0.52836               | 0.1604  | 0.476             |
| Kt/V: >1.4                       | <1.2               | -0.44155             | 0.40573               | 0.2765  | 0.643             |
| Pth (ng/l): 130-575              | <130               | -0.14831             | 0.18829               | 0.4309  | 0.862             |
| Pth (ng/l): >575                 | <130               | -0.41077             | 0.31436               | 0.1913  | 0.663             |

QUALITY OF LIFE AND SURVIVAL IN DIALYSIS

|                                    |   |          |         |        |       |
|------------------------------------|---|----------|---------|--------|-------|
| Atherosclerotic heart disease      | 1 | 0.25729  | 0.25741 | 0.3175 | 1.293 |
| Congestive heart failure           | 1 | -0.37752 | 0.16381 | 0.0212 | 0.686 |
| Cerebrovascular Disease            | 1 | -0.33113 | 0.18972 | 0.0809 | 0.718 |
| Peripheral Vascular Disease        | 1 | 0.22622  | 0.19131 | 0.237  | 1.254 |
| Dysrhythmia                        | 1 | -0.0933  | 0.16694 | 0.5762 | 0.911 |
| Cardiovascular Diseases<br>(other) | 1 | -0.46874 | 0.17116 | 0.0062 | 0.626 |
| COPD                               | 1 | -0.41306 | 0.18966 | 0.0294 | 0.662 |
| Gastro Intestinal Bleeding         | 1 | -0.07177 | 0.22279 | 0.7474 | 0.931 |
| Peripheral Vascular Disease        | 1 | -0.37025 | 0.25146 | 0.1409 | 0.691 |
| Cancer                             | 1 | 0.23247  | 0.33104 | 0.4825 | 1.262 |
| Diabetes                           | 1 | -0.25419 | 0.1678  | 0.1298 | 0.776 |
| Hypertension                       | 1 | -0.14605 | 0.17177 | 0.3952 | 0.864 |

---

ORS: Outcome Risk Score; COPD: Chronic Obstructive Pulmonary Disease; HD: Hemodialysis; HDF Hemodiafiltration.

**Supplementary Table 2. Odds ratio of baseline characteristics in Hospitalization Logistic Regression Outcome Risk Score (ORS) Model.** All baseline characteristics of the study sample are reported in table with the estimated odds ratio values and its significance level (p-value) in the ORS model.

| Variable                         | Reference Category | Coefficient Estimate | Std error coefficient | p-value | Odds Ratio (OR) |
|----------------------------------|--------------------|----------------------|-----------------------|---------|-----------------|
| Age                              |                    | 0.00455              | 0.00379               | 0.2295  | 1.005           |
| Gender (Male)                    | Female             | 0.0371               | 0.0536                | 0.4884  | 1.077           |
| Etiology: Glomerulonephritis     | Metabolic Syndrome | 0.0219               | 0.1003                | 0.8272  | 0.924           |
| Etiology: Polycystic Syndrome    | Metabolic Syndrome | 0.0137               | 0.1622                | 0.9328  | 0.916           |
| Etiology: Other                  | Metabolic Syndrome | -0.1369              | 0.0836                | 0.1015  | 0.788           |
| Vascular Access: Catheter        | Fistula            | 0.1206               | 0.0533                | 0.0237  | 1.273           |
| Dialysis Modality: HD            | HDF                | -0.0519              | 0.0517                | 0.3147  | 0.901           |
| Smoking Status: missing          | no-smoker          | -0.0347              | 0.0655                | 0.5959  | 1.049           |
| Smoking Status: Smoker/Ex-smoker | no-smoker          | 0.1175               | 0.0807                | 0.1453  | 1.222           |
| Haemoglobin (g/dl): 10-12        | <10                | 0.0773               | 0.0781                | 0.3224  | 1.137           |
| Haemoglobin (g/dl) >12           | <10                | -0.0259              | 0.0907                | 0.7754  | 1.026           |
| Calcium (mg/dl): 8.4-10          | <8.4               | 0.1065               | 0.0915                | 0.2445  | 0.979           |
| Calcium (mg/dl): >10             | <8.4               | -0.2346              | 0.1573                | 0.1359  | 0.696           |
| Phosphate (mg/dl): 2.5-5.5       | <2.5               | -0.0985              | 0.0993                | 0.3214  | 0.855           |
| Phosphate (mg/dl): >5.5          | <2.5               | 0.04                 | 0.1238                | 0.7468  | 0.982           |
| Albumin (g/dl): >3.5             | <3.5               | -0.0856              | 0.0844                | 0.3107  | 0.843           |
| Kt/V: 1.2-1.4                    | <1.2               | -0.0425              | 0.1696                | 0.8021  | 0.796           |
| Kt/V: >1.4                       | <1.2               | -0.1438              | 0.1326                | 0.2781  | 0.719           |
| Pth (ng/l): 130-575              | <130               | -0.0882              | 0.07                  | 0.2077  | 0.911           |

QUALITY OF LIFE AND SURVIVAL IN DIALYSIS

|                               |      |         |        |        |       |
|-------------------------------|------|---------|--------|--------|-------|
| Pth (ng/l): >575              | <130 | 0.0831  | 0.0999 | 0.4055 | 1.081 |
| Atherosclerotic heart disease | 1    | -0.088  | 0.0876 | 0.3154 | 0.839 |
| Congestive heart failure      | 1    | -0.0735 | 0.0573 | 0.1997 | 0.863 |
| Cerebrovascular Disease       | 1    | -0.0061 | 0.0716 | 0.9321 | 0.988 |
| Peripheral Vascular Disease   | 1    | -0.0349 | 0.0649 | 0.5907 | 0.933 |
| Dysrhythmia                   | 1    | -0.0408 | 0.0591 | 0.4899 | 0.922 |
| Cardiovascular Diseases       |      | 0.011   | 0.059  |        |       |
| (other)                       | 1    |         |        | 0.8521 | 1.022 |
| COPD                          | 1    | -0.3688 | 0.0776 | <.0001 | 0.478 |
| Gastro Intestinal Bleeding    | 1    | -0.1299 | 0.0801 | 0.105  | 0.771 |
| Peripheral Vascular Disease   | 1    | -0.1131 | 0.09   | 0.2088 | 0.797 |
| Cancer                        | 1    | -0.088  | 0.1103 | 0.425  | 0.839 |
| Diabetes                      | 1    | -0.1348 | 0.0555 | 0.0151 | 0.764 |
| Hypertension                  | 1    | -0.0222 | 0.0527 | 0.6731 | 0.957 |

---

ORS: Outcome Risk Score; COPD: Chronic Obstructive Pulmonary Disease; HD: Hemodialysis; HDF Hemodiafiltration.

**Supplementary Table 3. Risk Ratio in Hospitalization days Negative Binomial Outcome Risk Score (ORS) Model.** All baseline characteristics of the study sample are reported in table with the estimated risk ratio values and its significance level (p-value) in the ORS model.

| Variable                         | Reference Category | Coefficient Estimate | Std error coefficient | p-value | Risk Ratio (RR) |
|----------------------------------|--------------------|----------------------|-----------------------|---------|-----------------|
| Age                              |                    | -0.0029              | 0.0044                | 0.507   | 0.9971          |
| Gender (Male)                    | Female             | 0.1216               | 0.125                 | 0.3308  | 1.1293          |
| Etiology: Glomerulonephritis     | Metabolic Syndrome | -0.0035              | 0.1761                | 0.9844  | 0.9965          |
| Etiology: Polycystic Syndrome    | Metabolic Syndrome | -0.0721              | 0.2709                | 0.7901  | 0.9304          |
| Etiology: Other                  | Metabolic Syndrome | -0.1198              | 0.1449                | 0.4087  | 0.8871          |
| Vascular Access: Catheter        | Fistula            | 0.4582               | 0.1224                | 0.0002  | 1.5812          |
| Dialysis Modality: HD            | HDF                | -0.0407              | 0.1217                | 0.7383  | 0.9601          |
| Smoking Status: missing          | no-smoker          | 0.0245               | 0.1432                | 0.8643  | 1.0248          |
| Smoking Status: Smoker/Ex-smoker | no-smoker          | 0.1732               | 0.1657                | 0.296   | 1.1891          |
| Haemoglobin (g/dl): 10-12        | <10                | -0.1165              | 0.2197                | 0.5959  | 0.8900          |
| Haemoglobin (g/dl) >12           | <10                | -0.188               | 0.2371                | 0.4277  | 0.8286          |
| Calcium (mg/dl): 8.4-10          | <8.4               | 0.0762               | 0.1389                | 0.5832  | 1.0792          |
| Calcium (mg/dl): >10             | <8.4               | -0.0574              | 0.2827                | 0.8391  | 0.9442          |
| Phosphate (mg/dl): 2.5-5.5       | <2.5               | -0.4673              | 0.3064                | 0.1272  | 0.6267          |
| Phosphate (mg/dl): >5.5          | <2.5               | -0.5541              | 0.3497                | 0.1132  | 0.5746          |
| Albumin (g/dl): >3.5             | <3.5               | -0.1734              | 0.19                  | 0.3613  | 0.8408          |
| Kt/V: 1.2-1.4                    | <1.2               | 0.0298               | 0.4118                | 0.9423  | 1.0302          |
| Kt/V: >1.4                       | <1.2               | 0.0102               | 0.3562                | 0.9771  | 1.0103          |
| Pth (ng/l): 130-575              | <130               | 0.1315               | 0.143                 | 0.358   | 1.1405          |
| Pth (ng/l): >575                 | <130               | 0.1583               | 0.2053                | 0.4407  | 1.1715          |

QUALITY OF LIFE AND SURVIVAL IN DIALYSIS

|                                    |   |         |        |        |        |
|------------------------------------|---|---------|--------|--------|--------|
| Atherosclerotic heart disease      | 1 | 0.0483  | 0.1983 | 0.8077 | 1.0495 |
| Congestive heart failure           | 1 | -0.0489 | 0.129  | 0.7044 | 0.9523 |
| Cerebrovascular Disease            | 1 | -0.0967 | 0.1639 | 0.5551 | 0.9078 |
| Peripheral Vascular Disease        | 1 | 0.0035  | 0.1481 | 0.9813 | 1.0035 |
| Dysrhythmia                        | 1 | -0.2114 | 0.1347 | 0.1166 | 0.8095 |
| Cardiovascular Diseases<br>(other) | 1 | -0.1332 | 0.1326 | 0.3149 | 0.8753 |
| COPD                               | 1 | -0.3678 | 0.166  | 0.0268 | 0.6923 |
| Gastro Intestinal Bleeding         | 1 | -0.4309 | 0.1798 | 0.0165 | 0.6499 |
| Peripheral Vascular Disease        | 1 | -0.2247 | 0.2053 | 0.2736 | 0.7988 |
| Cancer                             | 1 | -0.1136 | 0.2515 | 0.6515 | 0.8926 |
| Diabetes                           | 1 | -0.3415 | 0.1309 | 0.0091 | 0.7107 |
| Hypertension                       | 1 | -0.1006 | 0.1201 | 0.4026 | 0.9043 |

---

ORS: Outcome Risk Score; COPD: Chronic Obstructive Pulmonary Disease; HD: Hemodialysis; HDF Hemodiafiltration.
